# Supplementary material for: First-principles study of multifunctional Mn2B3 materials with high hardness and ferromagnetism
Source: Royal Society of Chemistry journal article supplement (doi:10.1039/d3cp04414a), 2024-01-01
Supplement: d3cp04414a1.pdf [file d3cp04414a1.pdf]

**Figure S1.** The enthalpies of formation predicted by variable-composition evolutionary computations for the Mn–B system at (a) 50 GPa, (b) 100 GPa and (c) 200 GPa. Every circle represents an individual structure and the most stable ground-state phases (black circles) are connected to form the convex hull.





**Table S1.** Lattices Parameters and atomic coordinates of  $Cmcm$ - $Mn_2B_3$  at ambient pressure.

|           | Lattices Parameters (Å)              | Atoms     | x       | y       | z       |
|-----------|--------------------------------------|-----------|---------|---------|---------|
|           | $Cmcm$ - $Mn_2B_3$                   | a = 2.952 | Mn (4c) | 0.00000 | 0.20468 |
|           | b = 17.957                           | Mn (4c)   | 0.00000 | 0.07245 | 1.25000 |
|           | c = 2.965                            | B (4c)    | 0.50000 | 0.97591 | 1.25000 |
| P = 0 GPa | $\alpha = \beta = \gamma = 90^\circ$ | B (4c)    | 0.50000 | 0.17365 | 1.25000 |
|           |                                      | B (4c)    | 0.50000 | 0.88011 | 1.25000 |

**Table S2.** Lattices Parameters and atomic coordinates of  $C2/m$ - $Mn_2B_3$  at ambient pressure.

|           | Lattices Parameters (Å)      | Atoms     | x       | y       | z       |
|-----------|------------------------------|-----------|---------|---------|---------|
|           | $C2/m$ - $Mn_2B_3$           | a = 7.554 | Mn (4i) | 0.05607 | 0.50000 |
|           | b = 2.953                    | Mn (4i)   | 0.20309 | 0.50000 | 0.61177 |
|           | c = 8.114                    | B (4i)    | 0.25716 | 0.50000 | 0.18584 |
| P = 0 GPa | $\alpha = \gamma = 90^\circ$ | B (4i)    | 0.48782 | 0.50000 | 0.60603 |
|           | $\beta = 121.107^\circ$      | B (4i)    | 0.12637 | 0.00000 | 0.08799 |

**Table S3.** Lattices Parameters and atomic coordinates of  $C2/c$ - $Mn_2B_3$  at ambient pressure.

|           | Lattices Parameters (Å)      | Atoms     | x       | y       | z       |
|-----------|------------------------------|-----------|---------|---------|---------|
|           | $C2/c$ - $Mn_2B_3$           | a = 6.968 | Mn (8f) | 0.35295 | 0.36384 |
|           | b = 4.025                    | B (8f)    | 0.13691 | 0.36249 | 0.00206 |
|           | c = 5.507                    |           |         |         |         |
| P = 0 GPa | $\alpha = \gamma = 90^\circ$ | B (4e)    | 0.00000 | 0.65684 | 0.75000 |
|           | $\beta = 150.324^\circ$      |           |         |         |         |

**Table S4.** Unit cell parameters of binary borides  $\text{Ti}_2\text{B}_3$ ,  $\text{Mn}_2\text{B}_3$ ,  $\text{Nb}_2\text{B}_3$ ,  $\text{V}_2\text{B}_3$  and  $\text{Cr}_2\text{B}_3$ .

| Phase                   | a (Å)              | b (Å)               | c (Å)              | V (Å <sup>3</sup> )  |
|-------------------------|--------------------|---------------------|--------------------|----------------------|
| $\text{Mn}_2\text{B}_3$ | 2.952              | 17.957              | 2.965              | 157.216              |
| $\text{Cr}_2\text{B}_3$ | 2.930              | 18.170              | 2.949              | 156.977              |
|                         | 3.027 <sup>a</sup> | 19.119 <sup>a</sup> | 2.954 <sup>a</sup> | 162.016 <sup>a</sup> |
| $\text{V}_2\text{B}_3$  | 3.034              | 18.408              | 2.979              | 166.325              |
|                         | 3.061 <sup>b</sup> | 18.400 <sup>b</sup> | 2.984 <sup>b</sup> | 168.066 <sup>b</sup> |
| $\text{Nb}_2\text{B}_3$ | 3.324              | 19.603              | 3.141              | 204.711              |
|                         | 3.306 <sup>c</sup> | 19.481 <sup>c</sup> | 3.129 <sup>c</sup> | 201.528 <sup>c</sup> |
| $\text{Ti}_2\text{B}_3$ | 3.243              | 19.024              | 3.038              | 187.422              |
|                         | 3.243 <sup>d</sup> | 19.025 <sup>d</sup> | 3.038 <sup>d</sup> | 187.431 <sup>d</sup> |

**Ref a:** Okada S.; Atoda T.; Higashi I. Structural investigation of  $\text{Cr}_2\text{B}_3$ ,  $\text{Cr}_3\text{B}_4$ , and  $\text{CrB}$  by single-crystal diffractometry. *J. Solid State Chem.* **1987**, *68*, 61-67.

**Ref b:** Spear, K. E, Gilles, P. W. Phase and structure relationships in the vanadium-boron system. *HIGH TEMP SCI.* **1969**, *1*, 86-97.

**Ref c:** Yu, Y.; Tergenius, L. E.; Lundström, T.; Okada, S., A structural investigation of  $\text{V}_2\text{B}_3$  by single-crystal diffractometry. *J. Alloys Compd.* **1995**, *221*, 86-90.

**Ref d:** Li, P. F.; Zhou, R. L.; Xiao, C. Z., Computational Analysis of Stable Hard Structures in the Ti-B System, *ACS Appl. Mater. Interfaces.* **2015**, *7*, 15607.

**Figure S2.** Phonon dispersion curves and phonon density of states for  $Cmcm\text{-Mn}_2\text{B}_3$ , at (a) 0 GPa.  $C2/m\text{-Mn}_2\text{B}_3$ , at (b) 0 GPa and (c) 80 GPa.  $C2/c\text{-Mn}_2\text{B}_3$ , at (d) 0 GPa and (e) 200 GPa.



**Table S5.** Elastic constants of  $\text{TM}_2\text{B}_3\text{s}$  (SG:  $Cmcm$ ) including  $\text{Mn}_2\text{B}_3$ ,  $\text{Cr}_2\text{B}_3$ ,  $\text{V}_2\text{B}_3$ ,  $\text{Nb}_2\text{B}_3$ , and  $\text{Ti}_2\text{B}_3$ , as well as  $C2/m$ - and  $C2/c$ - $\text{Mn}_2\text{B}_3$  at ambient pressure.

| Phase<br>(SG)                         | $C_{11}$ | $C_{22}$ | $C_{33}$ | $C_{44}$ | $C_{55}$ | $C_{66}$ | $C_{12}$ | $C_{13}$ | $C_{15}$ | $C_{23}$ | $C_{25}$ | $C_{35}$ | $C_{46}$ |
|---------------------------------------|----------|----------|----------|----------|----------|----------|----------|----------|----------|----------|----------|----------|----------|
| $\text{Mn}_2\text{B}_3$<br>( $Cmcm$ ) | 321      | 481      | 526      | 205      | 172      | 155      | 101      | 125      |          | 127      |          |          |          |
| $\text{Cr}_2\text{B}_3$<br>( $Cmcm$ ) | 450      | 596      | 593      | 217      | 219      | 182      | 178      | 191      |          | 169      |          |          |          |
| $\text{V}_2\text{B}_3$<br>( $Cmcm$ )  | 496      | 654      | 640      | 245      | 255      | 224      | 138      | 148      |          | 112      |          |          |          |
| $\text{Nb}_2\text{B}_3$<br>( $Cmcm$ ) | 472      | 537      | 574      | 215      | 236      | 223      | 172      | 159      |          | 129      |          |          |          |
| $\text{Ti}_2\text{B}_3$<br>( $Cmcm$ ) | 438      | 543      | 595      | 237      | 244      | 218      | 119      | 108      |          | 70       |          |          |          |
| $\text{Mn}_2\text{B}_3$<br>( $C2/m$ ) | 430      | 494      | 430      | 188      | 155      | 172      | 127      | 194      | 24       | 179      | -10      | 63       | 17       |
| $\text{Mn}_2\text{B}_3$<br>( $C2/c$ ) | 439      | 478      | 448      | 151      | 190      | 93       | 227      | 230      | -23      | 199      | 38       | -17      | 25       |

**Table S6** Calculated bond parameters and Vickers hardness of  $\text{Mn}_2\text{B}_3$ (SG: $Cmcm$ ).

| Bond type | $d^\mu$ (Å) | $v_b^\mu$ (Å <sup>3</sup> ) | $P$  | $f_m$ ( $\times 10^{-3}$ ) | $H_v$ (GPa) |
|-----------|-------------|-----------------------------|------|----------------------------|-------------|
| B-B       | 1.709       | 0.661                       | 0.98 | 0                          | 20.0        |
|           | 1.719       | 0.673                       | 0.95 | 0                          |             |
|           | 1.798       | 0.770                       | 0.81 | 0                          |             |
|           | 2.952       | 3.409                       | 0.06 | 0                          |             |
|           | 2.952       | 3.409                       | 0.04 | 0                          |             |
| Mn-B      | 2.061       | 1.160                       | 0.04 | 5.940                      |             |
|           | 2.134       | 1.288                       | 0.26 | 5.940                      |             |
|           | 2.235       | 1.479                       | 0.34 | 5.940                      |             |
|           | 2.261       | 1.532                       | 0.05 | 5.940                      |             |
|           | 2.261       | 1.532                       | 0.09 | 5.940                      |             |
|           | 2.263       | 1.536                       | 0.05 | 5.940                      |             |
|           | 2.386       | 1.800                       | 0.05 | 5.940                      |             |
| Mn-Mn     | 2.952       | 3.409                       | 0.03 | 5.940                      |             |
|           | 2.965       | 3.454                       | 0.09 | 5.940                      |             |

**Table S7** Calculated bond parameters and Vickers hardness of Cr<sub>2</sub>B<sub>3</sub>(SG:*Cmcm*).

| Bond type | $d^{\mu}$ (Å) | $v_b^{\mu}$ (Å <sup>3</sup> ) | $P$  | $f_m (\times 10^{-3})$ | $H_v$ (GPa) |
|-----------|---------------|-------------------------------|------|------------------------|-------------|
| B-B       | 1.707         | 0.634                         | 0.88 | 0                      | 29.9        |
|           | 1.729         | 0.659                         | 0.82 | 0                      |             |
|           | 1.766         | 0.702                         | 0.76 | 0                      |             |
|           | 2.930         | 3.208                         | 0.05 | 0                      |             |
|           | 2.930         | 3.208                         | 0.02 | 0                      |             |
|           | 2.930         | 3.208                         | 0.03 | 0                      |             |
| Cr-B      | 2.119         | 1.214                         | 0.02 | 2.314                  |             |
|           | 2.152         | 1.271                         | 0.21 | 2.314                  |             |
|           | 2.247         | 1.447                         | 0.07 | 2.314                  |             |
|           | 2.255         | 1.462                         | 0.05 | 2.314                  |             |
|           | 2.264         | 1.480                         | 0.25 | 2.314                  |             |
|           | 2.270         | 1.492                         | 0.02 | 2.314                  |             |
|           | 2.342         | 1.638                         | 0.04 | 2.314                  |             |
| Cr-Cr     | 2.930         | 3.208                         | 0.07 | 2.314                  |             |
|           | 2.949         | 3.271                         | 0.02 | 2.314                  |             |

**Table S8** Calculated bond parameters and Vickers hardness of V<sub>2</sub>B<sub>3</sub>(SG:*Cmcm*).

| Bond type | $d^{\mu}$ (Å) | $v_b^{\mu}$ (Å <sup>3</sup> ) | $P$  | $f_m (\times 10^{-3})$ | $H_v$ (GPa) |
|-----------|---------------|-------------------------------|------|------------------------|-------------|
| B-B       | 1.724         | 0.893                         | 0.89 | 0                      | 22.9        |
|           | 1.729         | 0.901                         | 0.85 | 0                      |             |
|           | 1.760         | 0.950                         | 0.82 | 0                      |             |
| V-B       | 2.230         | 1.932                         | 0.18 | 1.542                  |             |
|           | 2.293         | 2.101                         | 0.04 | 1.542                  |             |
|           | 2.296         | 2.109                         | 0.06 | 1.542                  |             |
|           | 2.300         | 2.120                         | 0.01 | 1.542                  |             |
|           | 2.330         | 2.204                         | 0.24 | 1.542                  |             |
|           | 2.358         | 2.285                         | 0.05 | 1.542                  |             |
| V-V       | 2.979         | 4.607                         | 0.08 | 1.542                  |             |

**Table S9** Calculated bond parameters and Vickers hardness of Nb<sub>2</sub>B<sub>3</sub>(SG:*Cmcm*).

| Bond type | $d^{\mu}$ (Å) | $v_b^{\mu}$ (Å <sup>3</sup> ) | $P$  | $f_m (\times 10^{-3})$ | $H_v$ (GPa) |
|-----------|---------------|-------------------------------|------|------------------------|-------------|
| B-B       | 1.808         | 1.009                         | 0.81 | 0                      | 22.7        |
|           | 1.816         | 1.023                         | 0.77 | 0                      |             |
|           | 1.845         | 1.072                         | 0.75 | 0                      |             |
| Nb-B      | 2.403         | 2.369                         | 0.20 | 1.113                  |             |
|           | 2.460         | 2.542                         | 0.05 | 1.113                  |             |
|           | 2.462         | 2.548                         | 0.09 | 1.113                  |             |
|           | 2.508         | 2.693                         | 0.08 | 1.113                  |             |
|           | 2.601         | 3.004                         | 0.24 | 1.113                  |             |
| Nb-Nb     | 2.951         | 4.388                         | 0.04 | 1.113                  |             |

**Table S10** Calculated bond parameters and Vickers hardness of  $\text{Ti}_2\text{B}_3$ (SG:*Cmcm*).

| Bond type | $d^\mu$ (Å) | $v_b^\mu$ (Å <sup>3</sup> ) | $P$  | $f_m$ ( $\times 10^{-3}$ ) | $H_v$ (GPa) |
|-----------|-------------|-----------------------------|------|----------------------------|-------------|
| B-B       | 1.753       | 0.842                       | 0.90 | 0                          | 28.9        |
|           | 1.758       | 0.849                       | 0.84 | 0                          |             |
| Ti-B      | 1.773       | 0.871                       | 0.87 | 0                          | 1.368       |
|           | 2.352       | 2.032                       | 0.20 | 1.368                      |             |
|           | 2.382       | 2.111                       | 0.04 | 1.368                      |             |
|           | 2.386       | 2.122                       | 0.06 | 1.368                      |             |
|           | 2.393       | 2.141                       | 0.09 | 1.368                      |             |
|           | 2.425       | 2.228                       | 0.06 | 1.368                      |             |
|           | 2.520       | 2.500                       | 0.24 | 1.368                      |             |
| Ti-Ti     | 2.828       | 3.533                       | 0.07 | 1.368                      |             |

**Table S11** Calculated bond parameters and Vickers hardness of  $\text{Mn}_2\text{B}_3$ (SG:*C2/m*).

| Bond type | $d^\mu$ (Å) | $v_b^\mu$ (Å <sup>3</sup> ) | $P$  | $f_m$ ( $\times 10^{-3}$ ) | $H_v$ (GPa) |
|-----------|-------------|-----------------------------|------|----------------------------|-------------|
| B-B       | 1.714       | 1.444                       | 0.82 | 0                          | 20.9        |
|           | 1.727       | 1.478                       | 1.78 | 0                          |             |
|           | 1.780       | 1.618                       | 0.73 | 0                          |             |
|           | 1.834       | 1.770                       | 0.71 | 0                          |             |
|           | 2.782       | 6.176                       | 0.06 | 0                          |             |
| Mn-B      | 2.073       | 2.555                       | 0.22 | 3.458                      | 3.458       |
|           | 2.162       | 2.899                       | 0.12 | 3.458                      |             |
|           | 2.168       | 2.923                       | 0.23 | 3.458                      |             |
|           | 2.190       | 3.013                       | 0.48 | 3.458                      |             |
|           | 2.192       | 3.021                       | 0.12 | 3.458                      |             |
|           | 2.195       | 3.034                       | 0.29 | 3.458                      |             |
|           | 2.203       | 3.067                       | 0.12 | 3.458                      |             |
|           | 2.246       | 3.25                        | 0.02 | 3.458                      |             |
|           | 2.428       | 4.106                       | 0.24 | 3.458                      |             |

**Table S12** Calculated bond parameters and Vickers hardness of  $\text{Mn}_2\text{B}_3$ (SG:*C2/c*).

| Bond type | $d^\mu$ (Å) | $v_b^\mu$ (Å <sup>3</sup> ) | $P$  | $f_m$ ( $\times 10^{-3}$ ) | $H_v$ (GPa) |
|-----------|-------------|-----------------------------|------|----------------------------|-------------|
| B-B       | 1.791       | 0.990                       | 0.79 | 0                          | 15.6        |
|           | 1.854       | 1.099                       | 0.69 | 0                          |             |
|           | 1.938       | 1.255                       | 0.57 | 0                          |             |
|           | 2.232       | 1.917                       | 0.04 | 0                          |             |
| Mn-B      | 2.147       | 1.706                       | 0.14 | 5.507                      | 5.507       |
|           | 2.158       | 1.732                       | 0.04 | 5.507                      |             |
|           | 2.159       | 1.735                       | 0.15 | 5.507                      |             |
|           | 2.163       | 1.744                       | 0.28 | 5.507                      |             |
|           | 2.294       | 2.081                       | 0.13 | 5.507                      |             |
|           | 2.328       | 2.175                       | 0.11 | 5.507                      |             |
|           | 2.391       | 2.356                       | 0.01 | 5.507                      |             |
|           | 2.565       | 2.909                       | 0.01 | 5.507                      |             |
| Mn-Mn     | 2.565       | 2.909                       | 0.01 | 5.507                      |             |

**Table S13.** The Bader charge analysis of five  $\text{TM}_2\text{B}_3$ s (TM = Mn, Cr, V, Nb and Ti),  $C2/m$ - and  $C2/c$ - $\text{Mn}_2\text{B}_3$  in  $2 \times 2 \times 1$  cells. The positive (negative) sign denotes the loss (gain) of electrons. There is the number of atoms in brackets.

|                                  | TM (e)                 | B (e)                                                    |
|----------------------------------|------------------------|----------------------------------------------------------|
| $\text{Mn}_2\text{B}_3$          | +0.55 (16), +0.78 (16) | -0.38 (8), -0.41 (8), -0.46 (16), -0.47 (16)             |
| $\text{Cr}_2\text{B}_3$          | +0.69 (16), +0.89 (16) | -0.45 (8), -0.49 (8), -0.51 (16), -0.59 (16)             |
| $\text{V}_2\text{B}_3$           | +1.12 (16), +0.87 (16) | -0.59 (8), -0.61 (16), -0.63 (8), -0.78 (16)             |
| $\text{Nb}_2\text{B}_3$          | +0.95 (16), +1.28 (16) | -0.61 (8), -0.63 (8), -0.74 (16), -0.88 (16)             |
| $\text{Ti}_2\text{B}_3$          | +1.04 (16), +1.29 (16) | -0.64 (4), -0.68 (20), -0.66 (8), -0.99 (2), -1.00 (14), |
| $C2/m$ - $\text{Mn}_2\text{B}_3$ | +0.53 (16), +0.78 (16) | -0.36 (8), -0.38 (8), -0.44 (8), -0.45 (24),             |
| $C2/c$ - $\text{Mn}_2\text{B}_3$ | +0.56 (32)             | -0.16 (16), -0.48 (32)                                   |

**Table S14.** The averaged  $-ICOHP$  values (in eV/per bond) and bond lengths ( $\text{\AA}$ ) computed for some stronger TM-B and B-B bonds in five  $\text{TM}_2\text{B}_3$ s (TM = Mn, Cr, V, Nb and Ti),  $C2/m$ - and  $C2/c$ - $\text{Mn}_2\text{B}_3$ .

|                         | TM-B, B-B | bond length | -ICOHP |
|-------------------------|-----------|-------------|--------|
| $\text{Mn}_2\text{B}_3$ | Mn-B      | 2.185       | 1.282  |
|                         |           | 2.165       | 0.843  |
|                         |           | 2.121       | 0.782  |
|                         | B-B       | 1.720       | 3.615  |
|                         |           | 1.717       | 3.525  |
|                         |           | 1.769       | 3.151  |
| $\text{Cr}_2\text{B}_3$ | Cr-B      | 2.262       | 2.185  |
|                         |           | 2.151       | 1.933  |
|                         |           | 2.117       | 1.769  |
|                         | B-B       | 1.706       | 6.869  |
|                         |           | 1.732       | 6.735  |
|                         |           | 1.766       | 6.601  |
| $\text{V}_2\text{B}_3$  | V-B       | 2.318       | 2.198  |
|                         |           | 2.229       | 1.801  |
|                         |           | 2.212       | 1.518  |
|                         | B-B       | 1.732       | 6.914  |
|                         |           | 1.725       | 6.867  |
|                         |           | 1.761       | 6.404  |
| $\text{Nb}_2\text{B}_3$ | Nb-B      | 2.403       | 2.193  |
|                         |           | 2.602       | 1.984  |
|                         |           | 2.379       | 1.925  |
|                         | B-B       | 1.817       | 6.051  |
|                         |           | 1.809       | 5.901  |
|                         |           | 1.843       | 5.549  |

|                              |       |       |       |
|------------------------------|-------|-------|-------|
| $\text{Ti}_2\text{B}_3$      | Ti-B  | 2.510 | 1.862 |
|                              |       | 2.353 | 1.590 |
|                              |       | 2.341 | 1.256 |
|                              | B-B   | 1.773 | 6.453 |
|                              |       | 1.761 | 6.624 |
|                              |       | 1.755 | 6.620 |
| Ti-Ti                        | 2.819 | 0.772 |       |
|                              | 2.991 | 0.295 |       |
|                              |       |       |       |
| $C2/m\text{-Mn}_2\text{B}_3$ | Mn-B  | 2.175 | 1.234 |
|                              |       | 2.179 | 0.919 |
|                              |       | 2.111 | 0.830 |
|                              | B-B   | 1.723 | 3.299 |
|                              |       | 1.789 | 3.021 |
|                              |       | 1.822 | 2.891 |
| $C2/c\text{-Mn}_2\text{B}_3$ | Mn-B  | 2.153 | 1.527 |
|                              |       | 2.317 | 0.903 |
|                              |       | 2.161 | 0.792 |
|                              | B-B   | 1.822 | 2.983 |
|                              |       | 1.838 | 2.702 |
|                              |       |       |       |
